# Supplementary material for: Association between immune cells and endometrial cancer: A bidirectional Mendelian randomization study
Source: PubMed Central journal article supplement — Medicine (Baltimore). 2024 May 10;103(19):e38129. doi: 10.1097/MD.0000000000038129 (PMC11081576; doi:10.1097/md.0000000000038129), 2024-05-10
Supplement: medi-103-e38129-s001.pdf [file medi-103-e38129-s001.pdf]

## Online Supplementary Material

Xin Yun Zou, et al., Association Between Immune Cells And Endometrial Cancer: A Bidirectional Mendelian Randomization Study

**Table S1** Exploration of The Causal Effect of Immunophenotypes Onset On EC in MR analyses

<sup>1</sup>Abbreviations: CI, confidence interval; EC, endometrial cancer; MR, Mendelian randomization; OR, odds ratio; SNP, single nucleotide polymorphism.

**Supplementary Table 1** Exploration of The Causal Effect of Immunophenotypes Onset On EC in MR analyses

| Immunophenotypes       | <i>F</i> mean | Methods                   | N.SNP | OR   | 95% CI    | OR/ <i>P</i> val | Pleiotropy/ <i>P</i> val | heterogeneity/ <i>P</i> val |
|------------------------|---------------|---------------------------|-------|------|-----------|------------------|--------------------------|-----------------------------|
| Absolute count         |               |                           |       |      |           |                  |                          |                             |
| T cell AC              |               |                           |       |      |           |                  |                          |                             |
|                        | 23.03         | MR Egger                  | 20    | 0.99 | 0.87-1.12 | 0.896            | 0.148                    | 0.003                       |
|                        |               | Weighted median           | 20    | 0.93 | 0.86-1.00 | 0.064            |                          |                             |
|                        |               | Inverse variance weighted | 20    | 0.92 | 0.85-0.99 | 0.020            |                          | 0.001                       |
|                        |               | Simple mode               | 20    | 0.90 | 0.80-1.02 | 0.107            |                          |                             |
|                        |               | Weighted mode             | 20    | 0.92 | 0.85-1.01 | 0.087            |                          |                             |
| HLA DR+ CD4+ AC        |               |                           |       |      |           |                  |                          |                             |
|                        | 25.68         | MR Egger                  | 24    | 0.97 | 0.91-1.04 | 0.435            | 0.504                    | 0.467                       |
|                        |               | Weighted median           | 24    | 0.95 | 0.90-1.01 | 0.095            |                          |                             |
|                        |               | Inverse variance weighted | 24    | 0.95 | 0.92-1.00 | 0.018            |                          | 0.500                       |
|                        |               | Simple mode               | 24    | 0.91 | 0.83-1.00 | 0.067            |                          |                             |
|                        |               | Weighted mode             | 24    | 0.94 | 0.89-1.00 | 0.054            |                          |                             |
| CD45RA- CD28- CD8br AC |               |                           |       |      |           |                  |                          |                             |
|                        | 30.35         | MR Egger                  | 286   | 1.00 | 1.00-1.00 | 0.017            | 0.983                    | 0.036                       |
|                        |               | Weighted median           | 286   | 1.00 | 1.00-1.00 | 0.353            |                          |                             |
|                        |               | Inverse variance weighted | 286   | 1.00 | 1.00-1.00 | 0.004            |                          | 0.039                       |
|                        |               | Simple mode               | 286   | 1.00 | 1.00-1.00 | 0.367            |                          |                             |
|                        |               | Weighted mode             | 286   | 1.00 | 1.00-1.00 | 0.312            |                          |                             |
| CD62L- monocyte AC     |               |                           |       |      |           |                  |                          |                             |
|                        | 24.82         | MR Egger                  | 19    | 1.04 | 0.98-1.10 | 0.206            | 0.888                    | 0.036                       |
|                        |               | Weighted median           | 19    | 1.04 | 0.98-1.10 | 0.157            |                          |                             |

**Supplementary Table 1** Exploration of The Causal Effect of Immunophenotypes Onset On EC in MR analyses

|                        |       |                           |    |      |           |       |        |       |
|------------------------|-------|---------------------------|----|------|-----------|-------|--------|-------|
|                        |       | Inverse variance weighted | 19 | 1.04 | 1.00-1.08 | 0.039 |        | 0.039 |
|                        |       | Simple mode               | 19 | 1.09 | 1.00-1.20 | 0.069 |        |       |
|                        |       | Weighted mode             | 19 | 1.05 | 1.00-1.10 | 0.121 |        |       |
| CD33br HLA DR+ CD14dim |       |                           |    |      |           |       |        |       |
| AC                     |       |                           |    |      |           |       |        |       |
|                        | 24.07 | MR Egger                  | 26 | 0.94 | 0.90-1.00 | 0.021 | 0.2093 | 0.995 |
|                        |       | Weighted median           | 26 | 0.98 | 0.94-1.02 | 0.303 |        |       |
|                        |       | Inverse variance weighted | 26 | 0.97 | 0.94-1.00 | 0.021 |        | 0.991 |
|                        |       | Simple mode               | 26 | 0.98 | 0.92-1.05 | 0.541 |        |       |
|                        |       | Weighted mode             | 26 | 0.97 | 0.93-1.02 | 0.318 |        |       |
| CD33dim HLA DR+ CD11b- |       |                           |    |      |           |       |        |       |
| AC                     |       |                           |    |      |           |       |        |       |
|                        | 23.97 | MR Egger                  | 28 | 0.98 | 0.95-1.00 | 0.118 | 0.958  | 0.694 |
|                        |       | Weighted median           | 28 | 0.99 | 0.96-1.02 | 0.547 |        |       |
|                        |       | Inverse variance weighted | 28 | 0.98 | 0.95-1.00 | 0.034 |        | 0.742 |
|                        |       | Simple mode               | 28 | 0.94 | 0.88-1.00 | 0.076 |        |       |
|                        |       | Weighted mode             | 28 | 0.98 | 0.95-1.02 | 0.355 |        |       |
| Transitional AC        |       |                           |    |      |           |       |        |       |
|                        | 22.37 | MR Egger                  | 31 | 1.00 | 0.92-1.08 | 0.964 | 0.187  | 0.339 |
|                        |       | Weighted median           | 31 | 0.97 | 0.90-1.04 | 0.407 |        |       |
|                        |       | Inverse variance weighted | 31 | 0.95 | 0.91-1.00 | 0.049 |        | 0.299 |
|                        |       | Simple mode               | 31 | 1.01 | 0.89-1.14 | 0.904 |        |       |
|                        |       | Weighted mode             | 31 | 0.99 | 0.91-1.08 | 0.796 |        |       |
| CD14- CD16- AC         |       |                           |    |      |           |       |        |       |
|                        | 26.70 | MR Egger                  | 25 | 1.01 | 1.00-1.01 | 0.059 | 0.661  | 0.837 |

**Supplementary Table 1** Exploration of The Causal Effect of Immunophenotypes Onset On EC in MR analyses

|  |                       |                           |    |      |           |       |       |       |
|--|-----------------------|---------------------------|----|------|-----------|-------|-------|-------|
|  |                       | Weighted median           | 25 | 1.01 | 1.00-1.01 | 0.072 |       |       |
|  |                       | Inverse variance weighted | 25 | 1.01 | 1.00-1.01 | 0.033 |       | 0.865 |
|  |                       | Simple mode               | 25 | 1.03 | 0.98-1.08 | 0.293 |       |       |
|  |                       | Weighted mode             | 25 | 1.01 | 1.00-1.01 | 0.042 |       |       |
|  | Leukocyte AC          |                           |    |      |           |       |       |       |
|  | 23.08                 | MR Egger                  | 10 | 0.88 | 0.77-1.02 | 0.119 | 0.358 | 0.553 |
|  |                       | Weighted median           | 10 | 0.93 | 0.86-1.00 | 0.083 |       |       |
|  |                       | Inverse variance weighted | 10 | 0.94 | 0.89-1.01 | 0.035 |       | 0.554 |
|  |                       | Simple mode               | 10 | 0.93 | 0.82-1.00 | 0.280 |       |       |
|  |                       | Weighted mode             | 10 | 0.93 | 0.86-1.01 | 0.102 |       |       |
|  | MFI                   |                           |    |      |           |       |       |       |
|  | BAFF-R on CD20- CD38- |                           |    |      |           |       |       |       |
|  | 30.18                 | MR Egger                  | 17 | 0.93 | 0.88-0.98 | 0.011 | 0.43  | 0.55  |
|  |                       | Weighted median           | 17 | 0.94 | 0.88-1.00 | 0.036 |       |       |
|  |                       | Inverse variance weighted | 17 | 0.94 | 0.91-0.98 | 0.001 |       | 0.58  |
|  |                       | Simple mode               | 17 | 0.91 | 0.82-1.00 | 0.080 |       |       |
|  |                       | Weighted mode             | 17 | 0.94 | 0.89-0.99 | 0.023 |       |       |
|  | CD20 on IgD- CD24-    |                           |    |      |           |       |       |       |
|  | 22.78                 | MR Egger                  | 29 | 1.02 | 0.98-1.06 | 0.377 | 0.091 | 0.579 |
|  |                       | Weighted median           | 29 | 1.03 | 0.98-1.07 | 0.253 |       |       |
|  |                       | Inverse variance weighted | 29 | 1.04 | 1.01-1.07 | 0.005 |       | 0.464 |
|  |                       | Simple mode               | 29 | 1.04 | 0.96-1.13 | 0.373 |       |       |
|  |                       | Weighted mode             | 29 | 1.02 | 0.98-1.06 | 0.323 |       |       |
|  | CD38 on PB/PC         |                           |    |      |           |       |       |       |
|  | 22.26                 | MR Egger                  | 15 | 0.95 | 0.84-1.07 | 0.379 | 0.554 | 0.594 |

**Supplementary Table 1** Exploration of The Causal Effect of Immunophenotypes Onset On EC in MR analyses

|                          |       |                           |    |      |           |       |       |       |
|--------------------------|-------|---------------------------|----|------|-----------|-------|-------|-------|
|                          |       | Weighted median           | 15 | 0.94 | 0.86-1.03 | 0.177 |       |       |
|                          |       | Inverse variance weighted | 15 | 0.92 | 0.86-0.98 | 0.006 |       | 0.641 |
|                          |       | Simple mode               | 15 | 0.96 | 0.84-1.09 | 0.506 |       |       |
|                          |       | Weighted mode             | 15 | 0.95 | 0.85-1.05 | 0.336 |       |       |
| CD45RA on TD CD8br       | 27.95 | MR Egger                  | 12 | 1.09 | 0.95-1.24 | 0.239 | 0.879 | 0.328 |
|                          |       | Weighted median           | 12 | 1.04 | 0.96-1.14 | 0.332 |       |       |
|                          |       | Inverse variance weighted | 12 | 1.08 | 1.01-1.50 | 0.019 |       | 0.408 |
|                          |       | Simple mode               | 12 | 1.04 | 0.90-1.20 | 0.601 |       |       |
|                          |       | Weighted mode             | 12 | 1.02 | 0.89-1.17 | 0.778 |       |       |
| CD19 on PB/PC            |       |                           |    |      |           |       |       |       |
|                          | 21.92 | MR Egger                  | 24 | 1.01 | 0.93-1.10 | 0.840 | 0.223 | 0.792 |
|                          |       | Weighted median           | 24 | 1.04 | 0.97-1.11 | 0.321 |       |       |
|                          |       | Inverse variance weighted | 24 | 1.05 | 1.00-1.10 | 0.037 |       | 0.755 |
|                          |       | Simple mode               | 24 | 1.08 | 0.97-1.21 | 0.183 |       |       |
|                          |       | Weighted mode             | 24 | 1.02 | 0.94-1.11 | 0.644 |       |       |
| CD20 on IgD+ CD38- naive |       |                           |    |      |           |       |       |       |
|                          | 23.04 | MR Egger                  | 17 | 1.04 | 0.95-1.13 | 0.388 | 0.855 | 0.275 |
|                          |       | Weighted median           | 17 | 1.02 | 0.97-1.08 | 0.382 |       |       |
|                          |       | Inverse variance weighted | 17 | 1.05 | 1.00-1.09 | 0.028 |       | 0.335 |
|                          |       | Simple mode               | 17 | 1.02 | 0.94-1.11 | 0.593 |       |       |
|                          |       | Weighted mode             | 17 | 1.02 | 0.97-1.08 | 0.436 |       |       |
| CD25 on memory B cell    |       |                           |    |      |           |       |       |       |
|                          | 33.28 | MR Egger                  | 24 | 1.05 | 0.98-1.14 | 0.179 | 0.809 | 0.216 |
|                          |       | Weighted median           | 24 | 1.03 | 0.98-1.09 | 0.240 |       |       |

**Supplementary Table 1** Exploration of The Causal Effect of Immunophenotypes Onset On EC in MR analyses

|                               |  |                           |    |      |           |       |       |       |
|-------------------------------|--|---------------------------|----|------|-----------|-------|-------|-------|
|                               |  | Inverse variance weighted | 24 | 1.05 | 1.00-1.09 | 0.032 |       | 0.259 |
|                               |  | Simple mode               | 24 | 1.02 | 0.94-1.11 | 0.619 |       |       |
|                               |  | Weighted mode             | 24 | 1.04 | 0.99-1.00 | 0.142 |       |       |
| CD3 on CD28+ CD45RA-<br>CD8br |  |                           |    |      |           |       |       |       |
| 32.69                         |  | MR Egger                  | 20 | 0.99 | 0.90-1.10 | 0.880 | 0.365 | 0.568 |
|                               |  | Weighted median           | 20 | 0.97 | 0.91-1.03 | 0.319 |       |       |
|                               |  | Inverse variance weighted | 20 | 0.95 | 0.91-1.00 | 0.028 |       | 0.575 |
|                               |  | Simple mode               | 20 | 0.94 | 0.86-1.03 | 0.195 |       |       |
|                               |  | Weighted mode             | 20 | 0.96 | 0.91-1.02 | 0.250 |       |       |
| HVEM on TD CD8br              |  |                           |    |      |           |       |       |       |
| 21.53                         |  | MR Egger                  | 27 | 0.96 | 0.90-1.02 | 0.196 | 0.792 | 0.016 |
|                               |  | Weighted median           | 27 | 0.97 | 0.93-1.01 | 0.110 |       |       |
|                               |  | Inverse variance weighted | 27 | 0.97 | 0.94-1.00 | 0.037 |       | 0.021 |
|                               |  | Simple mode               | 27 | 0.98 | 0.92-1.05 | 0.612 |       |       |
|                               |  | Weighted mode             | 27 | 0.98 | 0.93-1.02 | 0.326 |       |       |
| CD16-CD56 on HLA DR+<br>NK    |  |                           |    |      |           |       |       |       |
| 25.01                         |  | MR Egger                  | 25 | 0.97 | 0.92-1.01 | 0.149 | 0.918 | 0.494 |
|                               |  | Weighted median           | 25 | 0.98 | 0.93-1.03 | 0.395 |       |       |
|                               |  | Inverse variance weighted | 25 | 0.97 | 0.94-1.00 | 0.050 |       | 0.552 |
|                               |  | Simple mode               | 25 | 0.98 | 0.91-1.06 | 0.612 |       |       |
|                               |  | Weighted mode             | 25 | 0.98 | 0.93-1.03 | 0.432 |       |       |
| CD127 on CD45RA+ CD4+         |  |                           |    |      |           |       |       |       |
| 26.47                         |  | MR Egger                  | 22 | 1.08 | 0.98-1.18 | 0.128 | 0.428 | 0.849 |

**Supplementary Table 1** Exploration of The Causal Effect of Immunophenotypes Onset On EC in MR analyses

|                                             |       |                           |    |      |           |       |       |       |
|---------------------------------------------|-------|---------------------------|----|------|-----------|-------|-------|-------|
|                                             |       | Weighted median           | 22 | 1.04 | 0.98-1.10 | 0.215 |       |       |
|                                             |       | Inverse variance weighted | 22 | 1.04 | 1.00-1.09 | 0.050 |       | 0.857 |
|                                             |       | Simple mode               | 22 | 1.03 | 0.94-1.13 | 0.511 |       |       |
|                                             |       | Weighted mode             | 22 | 1.02 | 0.94-1.11 | 0.609 |       |       |
| HLA DR on CD14- CD16+ monocyte              |       |                           |    |      |           |       |       |       |
|                                             | 54.86 | MR Egger                  | 17 | 0.93 | 0.85-1.02 | 0.148 | 0.573 | 0.095 |
|                                             |       | Weighted median           | 17 | 0.93 | 0.88-0.98 | 0.005 |       |       |
|                                             |       | Inverse variance weighted | 17 | 0.95 | 0.91-1.00 | 0.032 |       | 0.113 |
|                                             |       | Simple mode               | 17 | 0.91 | 0.83-1.00 | 0.061 |       |       |
|                                             |       | Weighted mode             | 17 | 0.93 | 0.88-0.98 | 0.018 |       |       |
| CD45 on Im MDSC                             |       |                           |    |      |           |       |       |       |
|                                             | 43.78 | MR Egger                  | 10 | 1.01 | 0.96-1.07 | 0.674 | 0.286 | 0.654 |
|                                             |       | Weighted median           | 10 | 1.02 | 0.98-1.07 | 0.263 |       |       |
|                                             |       | Inverse variance weighted | 10 | 1.04 | 1.01-1.07 | 0.023 |       | 0.611 |
|                                             |       | Simple mode               | 10 | 1.06 | 0.99-1.13 | 0.113 |       |       |
|                                             |       | Weighted mode             | 10 | 1.03 | 0.99-1.07 | 0.220 |       |       |
| Morphological parameter SSC-A on myeloid DC |       |                           |    |      |           |       |       |       |
|                                             | 29.87 | MR Egger                  | 18 | 1.05 | 1.01-1.09 | 0.029 | 0.397 | 0.713 |
|                                             |       | Weighted median           | 18 | 1.03 | 0.98-1.08 | 0.292 |       |       |
|                                             |       | Inverse variance weighted | 18 | 1.04 | 1.01-1.07 | 0.019 |       | 0.723 |
|                                             |       | Simple mode               | 18 | 0.97 | 0.88-1.07 | 0.536 |       |       |
|                                             |       | Weighted mode             | 18 | 1.04 | 1.00-1.09 | 0.109 |       |       |
| Relative count                              |       |                           |    |      |           |       |       |       |

**Supplementary Table 1** Exploration of The Causal Effect of Immunophenotypes Onset On EC in MR analyses

IgD+ CD38br %lymphocyte

|       |                           |    |      |           |       |       |       |
|-------|---------------------------|----|------|-----------|-------|-------|-------|
| 22.34 | MR Egger                  | 26 | 0.96 | 0.91-1.01 | 0.156 | 0.709 | 0.767 |
|       | Weighted median           | 26 | 0.96 | 0.91-1.02 | 0.183 |       |       |
|       | Inverse variance weighted | 26 | 0.95 | 0.92-1.00 | 0.013 |       | 0.804 |
|       | Simple mode               | 26 | 0.92 | 0.84-1.01 | 0.080 |       |       |
|       | Weighted mode             | 26 | 0.96 | 0.91-1.01 | 0.112 |       |       |

Naive-mature B  
cell %lymphocyte

|       |                           |    |      |           |       |       |       |
|-------|---------------------------|----|------|-----------|-------|-------|-------|
| 21.79 | MR Egger                  | 20 | 0.99 | 0.85-1.15 | 0.873 | 0.313 | 0.881 |
|       | Weighted median           | 20 | 0.94 | 0.87-1.02 | 0.157 |       |       |
|       | Inverse variance weighted | 20 | 0.92 | 0.86-0.97 | 0.005 |       | 0.869 |
|       | Simple mode               | 20 | 0.96 | 0.84-1.10 | 0.588 |       |       |
|       | Weighted mode             | 20 | 0.96 | 0.85-1.09 | 0.573 |       |       |

Secreting Treg %CD4

|       |                           |    |      |           |       |       |       |
|-------|---------------------------|----|------|-----------|-------|-------|-------|
| 31.95 | MR Egger                  | 23 | 1.02 | 0.99-1.05 | 0.137 | 0.396 | 0.846 |
|       | Weighted median           | 23 | 1.03 | 1.00-1.06 | 0.068 |       |       |
|       | Inverse variance weighted | 23 | 1.03 | 1.00-1.05 | 0.019 |       | 0.850 |
|       | Simple mode               | 23 | 1.02 | 0.97-1.07 | 0.441 |       |       |
|       | Weighted mode             | 23 | 1.02 | 1.00-1.05 | 0.113 |       |       |

CM CD4+ %T cell

|       |                           |    |      |           |       |       |       |
|-------|---------------------------|----|------|-----------|-------|-------|-------|
| 21.82 | MR Egger                  | 25 | 1.04 | 0.93-1.17 | 0.500 | 0.563 | 0.029 |
|       | Weighted median           | 25 | 1.06 | 0.98-1.14 | 0.161 |       |       |
|       | Inverse variance weighted | 25 | 1.07 | 1.01-1.14 | 0.018 |       | 0.034 |
|       | Simple mode               | 25 | 1.00 | 0.88-1.14 | 0.983 |       |       |
|       | Weighted mode             | 25 | 1.05 | 0.97-1.15 | 0.256 |       |       |



**Supplementary Table 1** Exploration of The Causal Effect of Immunophenotypes Onset On EC in MR analyses

| Immunophenotype          | Estimate | Method                    | N  | OR   | 95% CI    | P     | IVW   | P     |
|--------------------------|----------|---------------------------|----|------|-----------|-------|-------|-------|
| DP (CD4+CD8+) %leukocyte | 25.96    | MR Egger                  | 23 | 0.88 | 0.78-0.99 | 0.052 | 0.474 | 0.344 |
|                          |          | Weighted median           | 23 | 0.92 | 0.85-0.99 | 0.029 |       |       |
|                          |          | Inverse variance weighted | 23 | 0.92 | 0.87-0.97 | 0.002 |       |       |
|                          |          | Simple mode               | 23 | 0.88 | 0.77-1.02 | 0.106 |       |       |
|                          |          | Weighted mode             | 23 | 0.93 | 0.83-1.04 | 0.194 |       |       |
| B cell % CD3- lymphocyte | 24.48    | MR Egger                  | 28 | 1.03 | 1.00-1.06 | 0.027 | 0.496 | 0.967 |
|                          |          | Weighted median           | 28 | 1.04 | 1.01-1.07 | 0.018 |       |       |
|                          |          | Inverse variance weighted | 28 | 1.03 | 1.00-1.05 | 0.018 |       |       |
|                          |          | Simple mode               | 28 | 1.03 | 0.98-1.07 | 0.228 |       |       |
|                          |          | Weighted mode             | 28 | 1.03 | 1.01-1.05 | 0.020 |       |       |
| CD127- CD8br %T cell     | 21.68    | MR Egger                  | 13 | 0.96 | 0.82-1.12 | 0.591 | 0.505 | 0.240 |
|                          |          | Weighted median           | 13 | 0.92 | 0.84-1.01 | 0.078 |       |       |
|                          |          | Inverse variance weighted | 13 | 0.91 | 0.85-0.98 | 0.011 |       |       |
|                          |          | Simple mode               | 13 | 0.87 | 0.76-1.01 | 0.088 |       |       |
|                          |          | Weighted mode             | 13 | 0.91 | 0.81-1.04 | 0.190 |       |       |
| CD20- %lymphocyte        | 21.74    | MR Egger                  | 18 | 0.95 | 0.90-1.02 | 0.169 | 0.894 | 0.660 |
|                          |          | Weighted median           | 18 | 0.96 | 0.90-1.03 | 0.299 |       |       |
|                          |          | Inverse variance weighted | 18 | 0.95 | 0.91-0.99 | 0.024 |       |       |
|                          |          | Simple mode               | 18 | 1.01 | 0.91-1.12 | 0.890 |       |       |
|                          |          | Weighted mode             | 18 | 0.97 | 0.91-1.04 | 0.389 |       |       |

**Supplementary Table 1** Exploration of The Causal Effect of Immunophenotypes Onset On EC in MR analyses

| Immunophenotype                    | Estimate | Method                    | N  | OR   | 95% CI    | P     | IVW P | MR P  |       |
|------------------------------------|----------|---------------------------|----|------|-----------|-------|-------|-------|-------|
| CD11c+<br>monocyte %monocyte       | 21.80    | MR Egger                  | 20 | 1.06 | 0.97-1.15 | 0.225 | 0.905 | 0.935 |       |
|                                    |          | Weighted median           | 20 | 1.04 | 0.98-1.11 | 0.188 |       |       |       |
|                                    |          | Inverse variance weighted | 20 | 1.05 | 1.01-1.10 | 0.028 |       |       | 0.955 |
|                                    |          | Simple mode               | 20 | 1.00 | 0.89-1.12 | 0.960 |       |       |       |
|                                    |          | Weighted mode             | 20 | 1.01 | 0.92-1.11 | 0.885 |       |       |       |
| Im MDSC %CD33dim HLA<br>DR- CD66b- | 23.70    | MR Egger                  | 21 | 0.95 | 0.90-1.00 | 0.048 | 0.277 | 0.978 |       |
|                                    |          | Weighted median           | 21 | 0.96 | 0.92-1.00 | 0.062 |       |       |       |
|                                    |          | Inverse variance weighted | 21 | 0.97 | 0.94-1.00 | 0.045 |       |       | 0.968 |
|                                    |          | Simple mode               | 21 | 0.97 | 0.89-1.04 | 0.397 |       |       |       |
|                                    |          | Weighted mode             | 21 | 0.95 | 0.90-1.01 | 0.093 |       |       |       |
| NK %CD3- lymphocyte                | 26.44    | MR Egger                  | 24 | 0.97 | 0.95-1.00 | 0.036 | 0.520 | 0.947 |       |
|                                    |          | Weighted median           | 24 | 0.97 | 0.94-1.00 | 0.032 |       |       |       |
|                                    |          | Inverse variance weighted | 24 | 0.98 | 0.96-1.00 | 0.021 |       |       | 0.954 |
|                                    |          | Simple mode               | 24 | 0.96 | 0.92-1.01 | 0.107 |       |       |       |
|                                    |          | Weighted mode             | 24 | 0.97 | 0.94-0.99 | 0.024 |       |       |       |
| CD39+ CD4+ %CD4+                   | 144.56   | MR Egger                  | 23 | 1.01 | 0.93-1.01 | 0.834 | 0.170 | 0.810 |       |
|                                    |          | Weighted median           | 23 | 0.97 | 0.92-1.02 | 0.268 |       |       |       |
|                                    |          | Inverse variance weighted | 23 | 0.96 | 0.92-1.00 | 0.028 |       |       | 0.742 |
|                                    |          | Simple mode               | 23 | 0.99 | 0.91-1.07 | 0.755 |       |       |       |

**Supplementary Table 1** Exploration of The Causal Effect of Immunophenotypes Onset On EC in MR analyses

|                                |       | Weighted mode             | 23  | 0.99 | 0.92-1.06 | 0.735 |       |
|--------------------------------|-------|---------------------------|-----|------|-----------|-------|-------|
| CD45RA+ CD28- CD8br %T<br>cell |       |                           |     |      |           |       |       |
|                                | 28.68 | MR Egger                  | 177 | 1.00 | 1.00-1.00 | 0.099 | 0.944 |
|                                |       | Weighted median           | 177 | 1.00 | 1.00-1.00 | 0.800 |       |
|                                |       | Inverse variance weighted | 177 | 1.00 | 1.00-1.00 | 0.028 | 0.315 |
|                                |       | Simple mode               | 177 | 1.00 | 1.00-1.00 | 0.965 |       |
|                                |       | Weighted mode             | 177 | 1.00 | 1.00-1.00 | 0.501 |       |

<sup>1</sup>Abbreviations: CI, confidence interval; EC, endometrial cancer; MR, Mendelian randomization; OR, odds ratio; SNP, single nucleotide polymorphism.
