# Supplementary material for: Association between immune cells and endometrial cancer: A bidirectional Mendelian randomization study
Source: PubMed Central journal article supplement — Medicine (Baltimore). 2024 May 10;103(19):e38129. doi: 10.1097/MD.0000000000038129 (PMC11081576; doi:10.1097/md.0000000000038129), 2024-05-10
Supplement: medi-103-e38129-s004.pdf [file medi-103-e38129-s004.pdf]

## Online Supplementary Material

Xin Yun Zou, et al., Association Between Immune Cells And Endometrial Cancer: A Bidirectional Mendelian Randomization Study

**Table S2** Exploration of The Causal Effect of EC On Immunophenotypes in MR analyses

<sup>1</sup>Abbreviations: CI, confidence interval; EC, endometrial cancer; MR, Mendelian randomization; OR, odds ratio; SNP, single nucleotide polymorphism.

**Supplementary Table 2** Exploration of The Causal Effect of EC On Immunophenotypes in MR analyse

| Immunophenotypes               | <i>F</i> mean | Methods                   | N.SNP | OR   | 95% CI    | OR/ <i>P</i> val | Pleiotropy/ <i>P</i> val | heterogeneity/ <i>P</i> val |
|--------------------------------|---------------|---------------------------|-------|------|-----------|------------------|--------------------------|-----------------------------|
| Relative count                 |               |                           |       |      |           |                  |                          |                             |
| CM CD4+ %T cell                |               |                           |       |      |           |                  |                          |                             |
|                                | 28.53         | MR Egger                  | 57    | 0.83 | 0.68-1.03 | 0.099            | 0.418                    | 0.303                       |
|                                |               | Weighted median           | 57    | 0.90 | 0.81-1.01 | 0.073            |                          |                             |
|                                |               | Inverse variance weighted | 57    | 0.90 | 0.83-0.98 | 0.019            |                          | 0.313                       |
| CD127- CD8br %T cell           |               |                           |       |      |           |                  |                          |                             |
|                                | 28.53         | MR Egger                  | 57    | 1.24 | 1.01-1.52 | 0.048            | 0.571                    | 0.269                       |
|                                |               | Weighted median           | 57    | 1.15 | 1.03-1.29 | 0.015            |                          |                             |
|                                |               | Inverse variance weighted | 57    | 1.17 | 1.08-1.27 | 0.000            |                          | 0.289                       |
| MFI                            |               |                           |       |      |           |                  |                          |                             |
| HVEM on TD CD8br               |               |                           |       |      |           |                  |                          |                             |
|                                | 28.52         | MR Egger                  | 57    | 0.69 | 0.48-0.99 | 0.052            | 0.269                    | 0.057                       |
|                                |               | Weighted median           | 57    | 0.81 | 0.67-0.99 | 0.040            |                          |                             |
|                                |               | Inverse variance weighted | 57    | 0.83 | 0.72-0.97 | 0.015            |                          | 0.052                       |
| HLA DR on CD14- CD16+ monocyte |               |                           |       |      |           |                  |                          |                             |
|                                | 28.45         | MR Egger                  | 55    | 0.92 | 0.76-1.12 | 0.418            | 1.000                    | 0.690                       |
|                                |               | Weighted median           | 55    | 0.91 | 0.81-1.03 | 0.135            |                          |                             |
|                                |               | Inverse variance weighted | 55    | 0.92 | 0.85-1.00 | 0.044            |                          | 0.724                       |

<sup>1</sup>Abbreviations: CI, confidence interval; EC, endometrial cancer; MR, Mendelian randomization; OR, odds ratio; SNP, single nucleotide polymorphism.
