# Supplementary material for: Association between immune cells and endometrial cancer: A bidirectional Mendelian randomization study
Source: PubMed Central journal article supplement — Medicine (Baltimore). 2024 May 10;103(19):e38129. doi: 10.1097/MD.0000000000038129 (PMC11081576; doi:10.1097/md.0000000000038129), 2024-05-10

## Online Supplementary Material

Xin Yun Zou,et al., Association Between Immune Cells And Endometrial Cancer : A Bidirectional Mendelian Randomization Study

Fig. S2 The stability of CM CD4+ %T cells was demonstrated by forest plot, scatter plot and funnel plot. (Causal effect of EC on CM CD4+ %T cells analysed by MR )

Abbreviations: IVW , inverse variance weighting ;EC, endometrial cancer; MR, Mendelian randomization; SNP, single nucleotide polymorphism.

Fig.S2

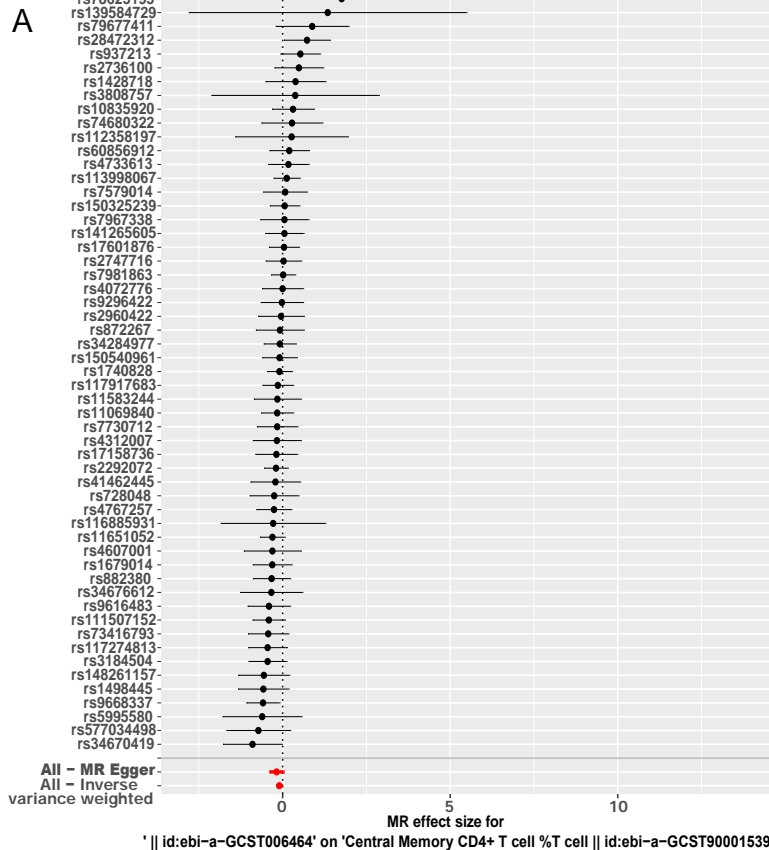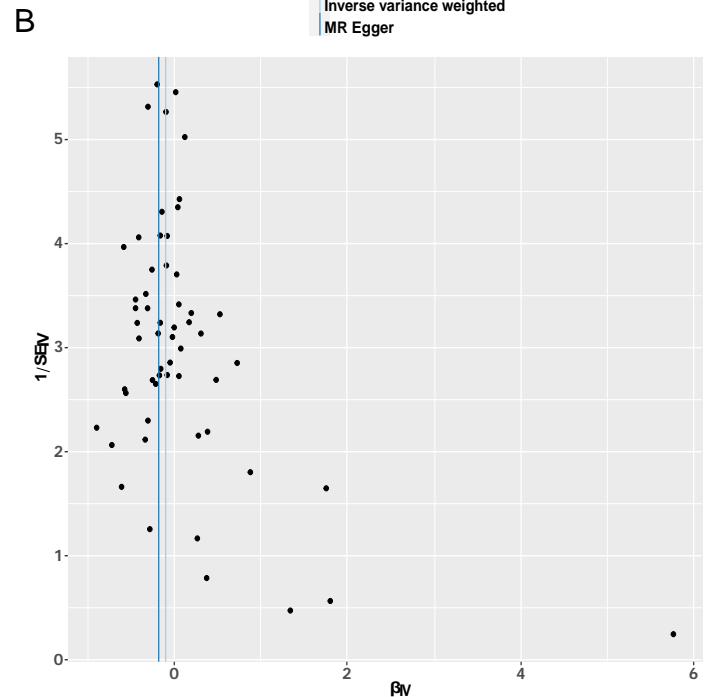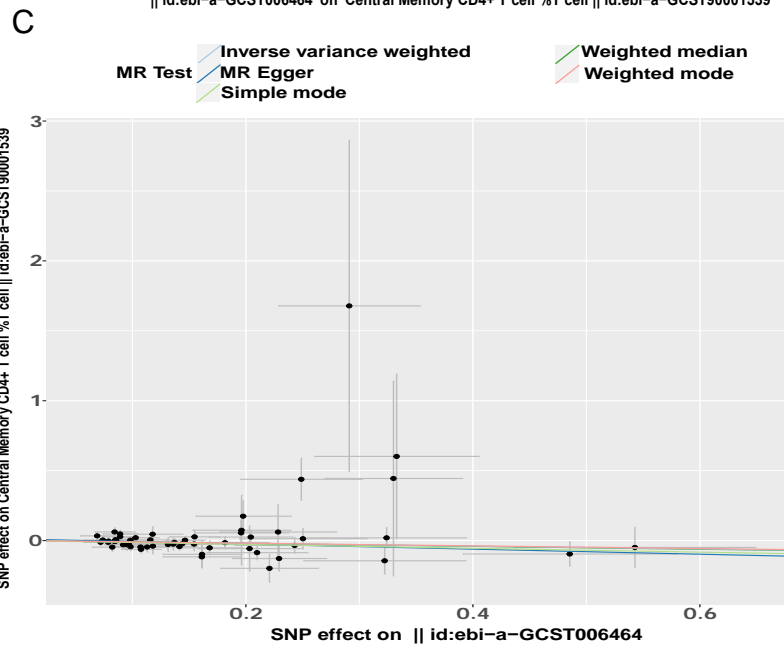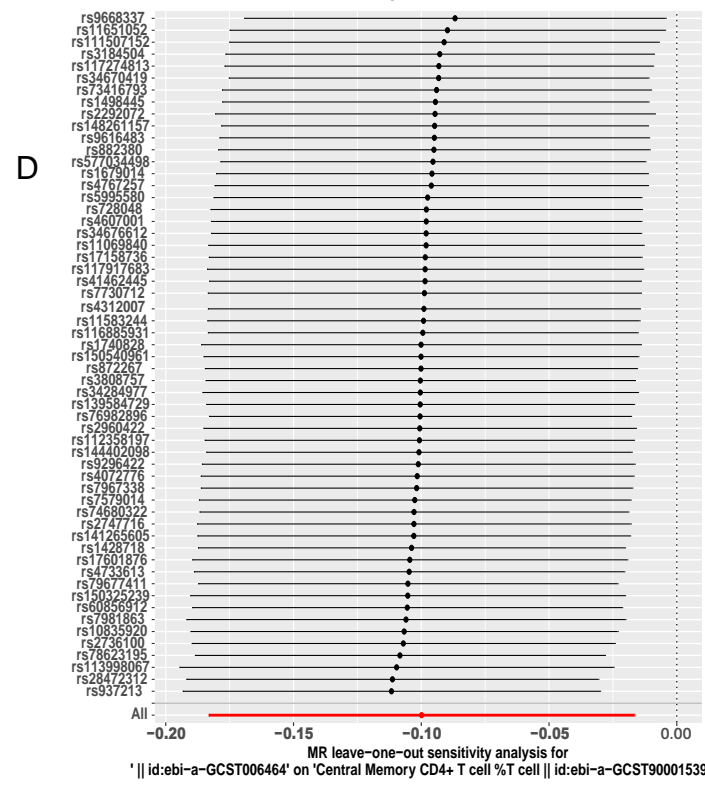

Supplement: medi-103-e38129-s006.pdf [file medi-103-e38129-s006.pdf]
